# Supplementary material for: Distinct Pathogenesis and Host Responses during Infection of C. elegans by P. aeruginosa and S. aureus
Source: PLoS Pathog. 2010 Jul 1;6(7):e1000982. doi: 10.1371/journal.ppat.1000982 (PMC2895663; doi:10.1371/journal.ppat.1000982)
Supplement: Table S3 — List of genes whose expression changed during infection with S. aureus and during exposure to B. thuringiensis PFT Cry5B. (0.03 MB XLS) [file ppat.1000982.s015.xls]

## Sheet: Table S3.txt
Supplemental Table 3: Comparison with Cry5B-induced genes
Primary Sequence Name	Sequence Code	Sequence Description
C18A11.1	184853_at	short, basic
C34C6.7	178441_at	Unknown
C48B4.1	190156_s_at	Acyl-CoA oxidase I
C50F7.5	183381_at	secreted, acidic, Pro rich
lact-3	173634_at	secreted esterase
dod-22	183624_at	secreted, CUB-like domain
F45D3.4	178900_s_at	secreted, acidic
F45D3.4	173550_at	secreted, acidic
F49H6.13	181459_at	secreted, short, basic
F52F10.3	174957_s_at	12 transmembrane segments, acyltransferase
F53A9.1	180453_at	short, His-rich
F53A9.2	180642_at	short, His-rich
F53A9.6	172363_x_at	short, His-rich
F53A9.8	180612_s_at	short, His-rich
ins-11	173224_s_at	insulin
lact-3	188063_s_at	secreted esterase
R07C12.1	186273_at	Unknown
sodh-1	190978_at	alcohol dehydrogenase
T27C5.8	178312_at	DUF1164
T28B8.1	178359_s_at	short, acidic
ZC443.3	178432_s_at	Unknown
ZC443.3	173558_at	Unknown
